# Supplementary material for: Characterization of Cronobacter sakazakii and Cronobacter malonaticus Strains Isolated from Powdered Dairy Products Intended for Consumption by Adults and Older Adults
Source: MDPI journal article supplement (doi:10.3390/microorganisms11122841), 2023-11-23
Supplement: s1 [file s1]

Supplementary Table S1: Process data of genomic sequencing of the strains studied.

| ID        | Avg. Coverage | Avg. Read Length | No. of Contigs | N50     | Genome Size /Mb) | No. of Reads |
|-----------|---------------|------------------|----------------|---------|------------------|--------------|
| 510299    | 77            | 248              | 464            | 232,579 | 5.03             | 1,345,648    |
| 510300    | 63            | 263              | 127            | 167,359 | 4.75             | 1,050,716    |
| 510178-22 | 46            | 155              | 203            | 69,168  | 4.5              | 1,152,347    |
| 510177-22 | 68            | 153              | 1,822          | 78,588  | 5.4              | 1,470,178    |
| 510441    | 56            | 229              | 1,983          | 246,448 | 5.6              | 1,065,592    |
